# Supplementary material for: Effects of subanaesthetic S-ketamine on postoperative delirium and cognitive function in elderly patients undergoing non-cardiac thoracic surgery: a protocol for a randomised, double-blinded, placebo-controlled and positive-controlled, non-inferiority trial (SKED trial)
Source: HighWire-hosted journal article supplement (doi:10.1136/bmjopen-2022-061535), 2022-08-01
Supplement: bmjopen-2022-061535supp001_data_supplement.pdf [file bmjopen-2022-061535supp001_data_supplement.pdf]

Supplementary table 1 Richmond agitation-sedation scale

| Score | Term              | Description                                                                                   |
|-------|-------------------|-----------------------------------------------------------------------------------------------|
| +4    | Combative         | Overtly combative or violate; immediate danger to staff                                       |
| +3    | Very agitated     | Pulls on or removes tube(s) or catheter(s); aggressive                                        |
| +2    | Agitated          | Frequent non-purposeful movement, fights ventilator                                           |
| +1    | Restless          | Anxious but movements not aggressive or vigorous                                              |
| 0     | Alert and calm    |                                                                                               |
| -1    | Drowsy            | Not fully alert, but has sustained (>10 seconds) awakening (eye-opening/eye contact) to voice |
| -2    | Light sedation    | Briefly (<10 seconds) awakens with eye contact to voice                                       |
| -3    | Moderate sedation | Movement or eye opening (but no eye contact) to voice                                         |
| -4    | Deep sedation     | No response to voice, but any movement to physical stimulation                                |
| -5    | Unarousable       | No response to voice or physical stimulation                                                  |

Supplementary table 2 CAM-S short form scale\*

| Feature                          | Severity Score |                |                  |
|----------------------------------|----------------|----------------|------------------|
|                                  | Not Present    | Present (mild) | Present (marked) |
| Acute onset & fluctuation course | 0              | 1              | —                |
| Inattention                      | 0              | 1              | 2                |
| Disorganized thinking            | 0              | 1              | 2                |
| Altered level of consciousness   | 0              | 1              | 2                |

\*: Rate each symptom of delirium listed in the 3D-CAM as absent (0), mild (1), marked (2). Acute onset & fluctuation course is rated as absent (0) or present (1). Add these scores into a composite. Higher scores indicate more severe delirium.

Supplementary table 3 Chart-based delirium identification instrument

| Question                                                                                                                                                                                                                                 | Circle answer                                                                 |
|------------------------------------------------------------------------------------------------------------------------------------------------------------------------------------------------------------------------------------------|-------------------------------------------------------------------------------|
| Is there any evidence in the chart of acute confusion (e.g., delirium, mental status change, disorientation, hallucinations, agitation etc.)? Review entire medical record, including progress notes, nursing notes, consult notes, etc. | Yes<br>No<br>Uncertain                                                        |
| What is the source of information about the first episode of acute confusion?                                                                                                                                                            | Nurse's notes<br>Physician's notes<br>Other (specify): _____                  |
| Approximate time of onset first episode of acute confusion? Check nurse's notes, progress notes, orders, laboratories, for the earliest time referable to the event.                                                                     | Date: ___ / ___ / ___<br>Month Day Year<br>Time: ___ : ___ am/pm<br>Uncertain |

Supplementary table 4 Telephone interview for cognitive status-40 (TICS-40) instrument  
Chinese version

| Item                                                                                                      | Score |
|-----------------------------------------------------------------------------------------------------------|-------|
| What is today's date?                                                                                     | 5     |
| What is your address?                                                                                     | 3     |
| Counting backwards from 20 to 1                                                                           | 2     |
| Repeating following 10 words: ball, flag, woods, watch, television, cellphone, scissor, pillow, pen, whip | 10    |
| Subtracting 7 from 100, 93, 86, 79, 72, 65                                                                | 5     |
| What do people usually use to cut paper?                                                                  | 2     |
| Say this "no pains, no gains"                                                                             | 1     |
| President's and prime minister's name                                                                     | 2     |
| Recalling 10 words above mentioned                                                                        | 10    |
